# Supplementary material for: NAC domain transcription factors VNI2 and ATAF2 form protein complexes and regulate leaf senescence
Source: PubMed Central journal article supplement (PMC10507225; doi:10.1002/pld3.529), 2023-09-18
Supplement: PLD3-7-e529-s003.pdf [file PLD3-7-e529-s003.pdf]

**Table S1.** Oligonucleotides used in this study.

| Primer                        | Primer Sequence (5'-3')                                             | Purpose                                              |
|-------------------------------|---------------------------------------------------------------------|------------------------------------------------------|
| <i>VNI2F</i>                  | CACCATGGATAAATGTCAAACCTGTTAAGAATGGT                                 | For amplifying CDS sequence of <i>VNI2</i> gene      |
| <i>VNI2R</i>                  | TCATCTGAAACTATTGCAACTACTGGTCTC                                      | For amplifying CDS sequence of <i>VNI2</i> gene      |
| <i>ATAF2F</i>                 | CACCATGAAGTCGGAGCTAAATTACCA                                         | For amplifying CDS sequence of <i>ATAF2</i> gene     |
| <i>ATAF2R</i>                 | TTACCCCTGTGGAGCAAACTCCAATTC                                         | For amplifying CDS sequence of <i>ATAF2</i> gene     |
| <i>ORE1</i> promoter F        | CACCTATCTCTATTAACGGTTACCATCAAAATTT                                  | For amplifying promoter sequence of <i>ORE1</i> gene |
| <i>ORE1</i> promoter R        | GTAATCCATTTTATCCTAATAGGGTTTCTA                                      | For amplifying promoter sequence of <i>ORE1</i> gene |
| <i>ORS1</i> promoter F        | CACCCAGTCTTAGCTAGTTGTTTTATTTAATT                                    | For amplifying promoter sequence of <i>ORS1</i> gene |
| <i>ORS1</i> promoter R        | GTAATCCATTTTACGCGATTAGATATAATCA                                     | For amplifying promoter sequence of <i>ORS1</i> gene |
| <i>VNI2</i> promoter F        | CACCGAAATCGATCATTTTTTTTATTTAATTTAG                                  | For amplifying promoter sequence of <i>VNI2</i> gene |
| <i>VNI2</i> promoter R        | ATTATCCATGGTGGTTCCAAACAAAGAGAG                                      | For amplifying promoter sequence of <i>VNI2</i> gene |
| Multiple cloning site (MCS) F | CACCTAGTGGATCCCCGGGCTGCAGGAATTCGATATCAAGCTTATCGATACCGTCGACCTCGTGATG | For amplifying CDS sequence of MCS                   |
| Multiple cloning site (MCS) R | CATCACGAGGTCGACGGTATCGATAAGCTTGATATCGAATTCCTGCAGCCCGGGGATCCACTAGGTG | For amplifying CDS sequence of MCS                   |
| <i>ATAF2-RTF</i>              | TCTTCTACGCAGGGAAGCTCC                                               | Primer used for qRT-PCR                              |
| <i>ATAF2-RTR</i>              | AGCCATTGTCGTGGTCTCG                                                 | Primer used for qRT-PCR                              |
| <i>ORE1-RTF</i>               | CTTACCATGGAAGGCTAAGATGGG                                            | Primer used for qRT-PCR                              |
| <i>ORE1-RTR</i>               | TCGGGTATTTCCGGTCTCTCAC                                              | Primer used for qRT-PCR                              |
| <i>ORS1-RTF</i>               | CCTTGAAGGCTAAGCTTGG                                                 | Primer used for qRT-PCR                              |
| <i>ORS1-RTR</i>               | ATCAGCGAGGTAAACCAAC                                                 | Primer used for qRT-PCR                              |
| <i>ANAC046-RTF</i>            | GGTTTCGGTTTACCCCTACTGATG                                            | Primer used for qRT-PCR                              |
| <i>ANAC046-RTR</i>            | ATGGCTCGTTCTTGTGAGGTC                                               | Primer used for qRT-PCR                              |
| <i>VNI2-RTF</i>               | TTTGACAGAGCTGATCCTTGG                                               | Primer used for qRT-PCR                              |
| <i>VNI2-RTR</i>               | CGGTTCCCATTTGGGTATTT                                                | Primer used for qRT-PCR                              |
| <i>SAG13-RTF</i>              | AGGGAGCATCGTGCTCATATCC                                              | Primer used for qRT-PCR                              |
| <i>SAG13-RTR</i>              | CCAGCTGATTCATGGCTCCTTTG                                             | Primer used for qRT-PCR                              |
| <i>SAG29-RTF</i>              | TAAGCGCCGTATGTGGTTCGC                                               | Primer used for qRT-PCR                              |
| <i>SAG29-RTR</i>              | ATCCACCACGTTTGAATCGC                                                | Primer used for qRT-PCR                              |
| <i>eIF4a-RTF</i>              | TGACCACACAGTCTCTGCAA                                                | Primer used for qRT-PCR                              |
| <i>eIF4a-RTR</i>              | ACCAGGGAGACTTGTGGAC                                                 | Primer used for qRT-PCR                              |
| <i>VNI2</i> - a               | CACCATGGATAAATGTCAAACCTGTTAAGAATGGT                                 | Primer used for RT-PCR in S4                         |
| <i>VNI2</i> - b               | TCATCTGAAACTATTGCAACTACTGGTCTC                                      | Primer used for RT-PCR in S4                         |
| <i>ATAF2</i> - c              | CACCATGAAGTCGGAGCTAAATTACCA                                         | Primer used for RT-PCR in S4                         |
| <i>ATAF2</i> - d              | TTACCCCTGTGGAGCAAACTCCAATTC                                         | Primer used for RT-PCR in S4                         |
